# Supplementary material
Source: MDPI journal article supplement (https://www.mdpi.com/2073-4344/11/10/1231)
Supplement: s1 [file s1]

1. S1. Results of BET measurements of the 60Al-40M-Cat-Pt
2. S2. Results of BET measurements of the 60Al-40M-Cat-Pt after 100h
3. S3. Results of BET Measurements of the 60Al-40M-Cat-Pt after 260 h
4. S4. Results of BET measurements of the 75Al-25M-Cat-Pt
5. S5. Results of BET measurements of the 90Al-10M-Cat-Pt
6. S6. Results of BET measurements of the 60Al-40M-Support
7. S7. Results of BET measurement of the 75Al-25M-Support
8. S8. Results of BET measurement of the 90Al-10M-Support
9. S9. Results of BET measurement of the regenerated 75Al-25M-Cat-Pt
10. S10. Results of BET measurement of the used 75Al-25M-Cat-Pt
